# Supplementary material for: De novo assembly, characterization and functional annotation of Senegalese sole (Solea senegalensis) and common sole (Solea solea) transcriptomes: integration in a database and design of a microarray
Source: PubMed Central journal article supplement (PMC4232633; doi:10.1186/1471-2164-15-952), 2014-11-03

**A**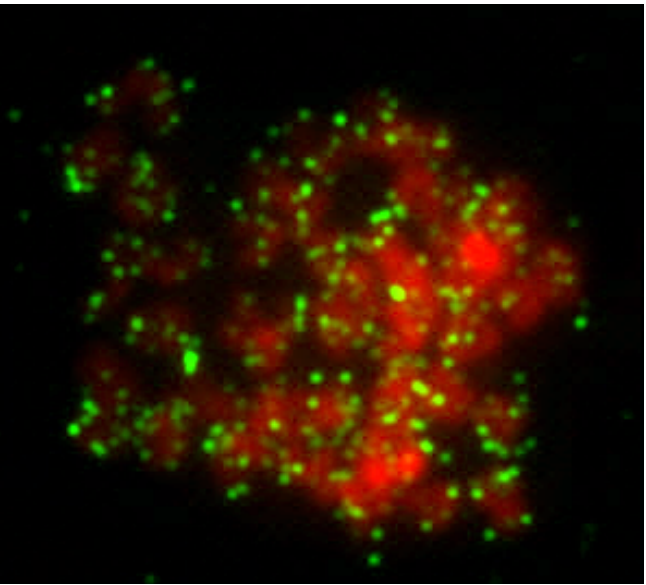**B**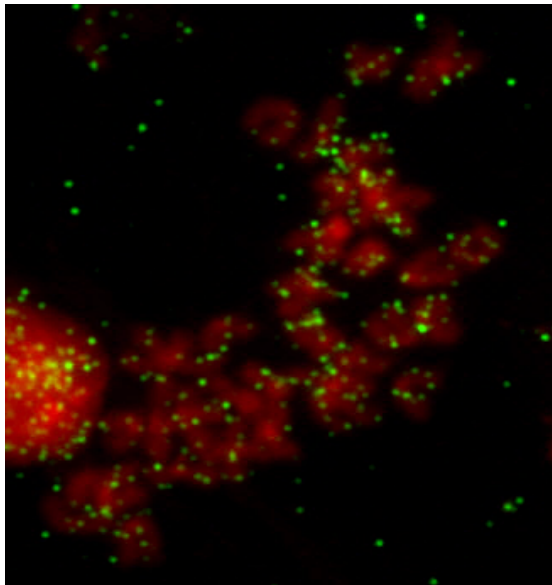**C**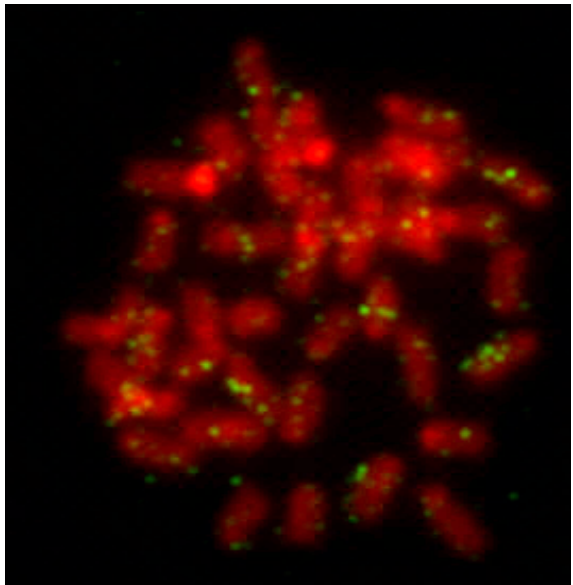

Supplement: 12864_2014_6645_MOESM9_ESM.pdf [file 12864_2014_6645_MOESM9_ESM.pdf]
